# Supplementary material
Source: PubMed Central journal article supplement (PMC5009477)
Supplement: Supplementary_Digital_Content_updated.pdf [file Supplementary_Digital_Content_updated.pdf]

**A**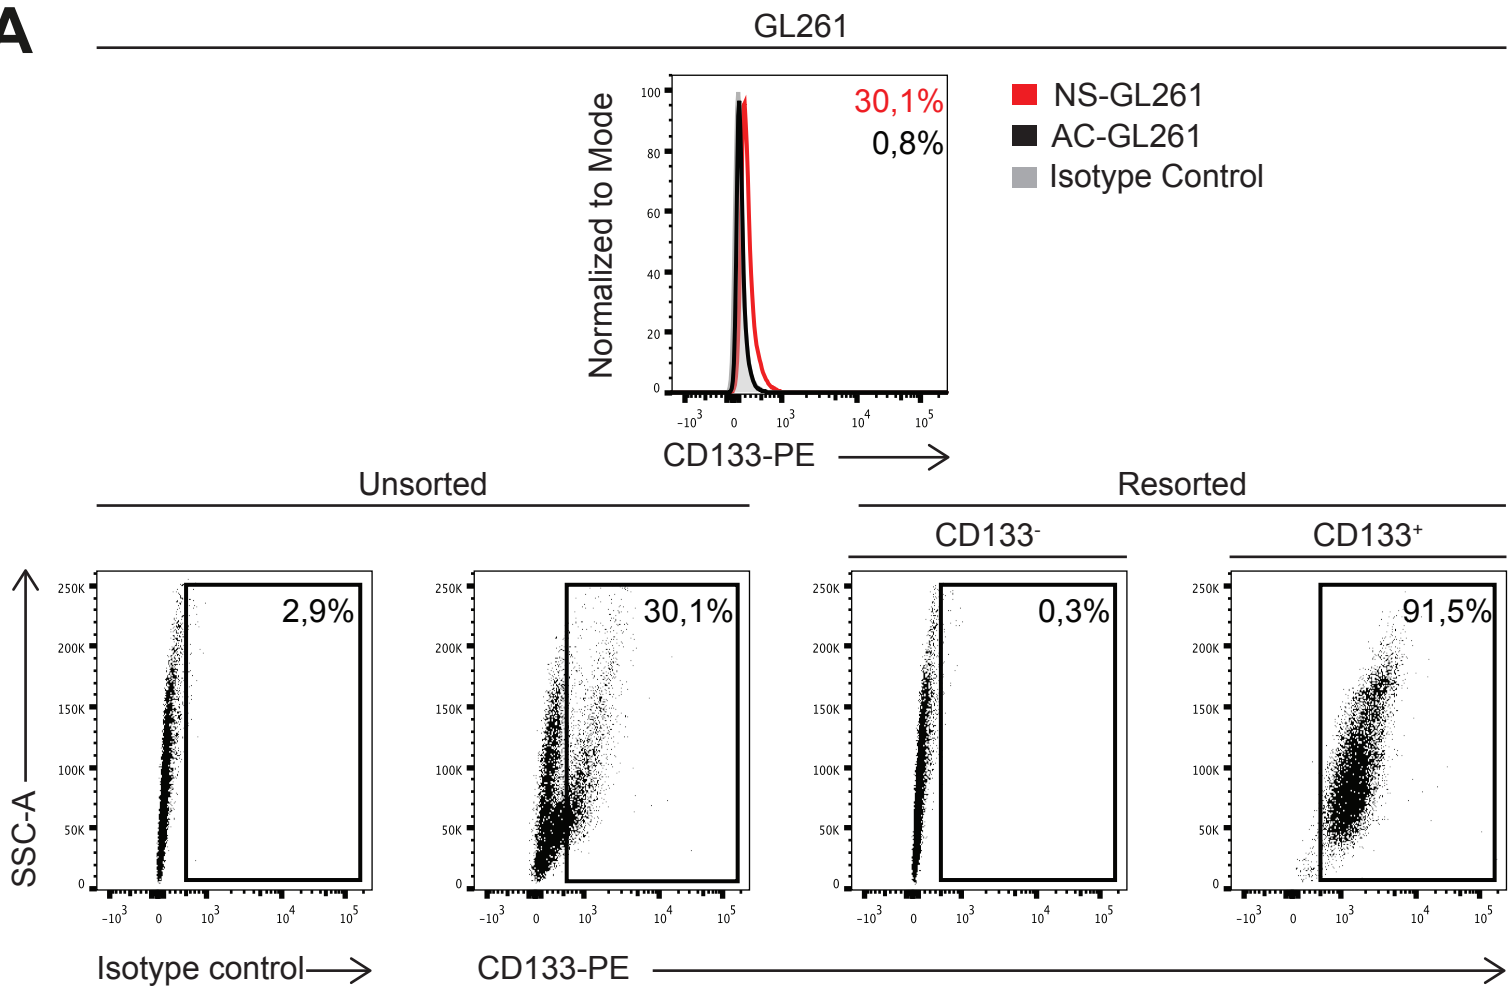**B**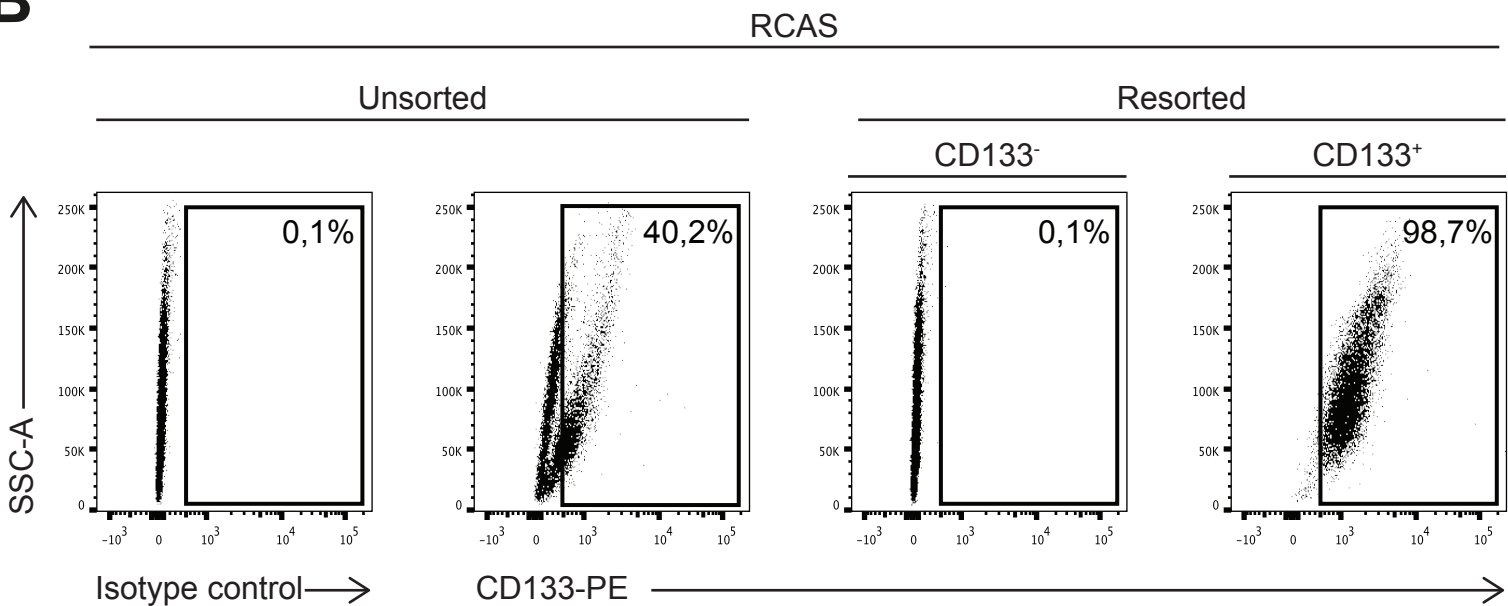

**Supplementary Data Figure 1. The mouse cell line GL261 and RCAS-PDGFB murine tumor model used in the present study contains a population of CD133<sup>+</sup> cells with increased tumorigenic potential, which is lost after differentiation.**

(A) The percentage of CD133<sup>+</sup> cells in neurosphere GL261 cells is 30,1% while in adhesive GL261 it is less than 1%. The mouse astrocytoma cell line GL261 contained a population of CD133<sup>+</sup> cells, which could be purified by FACS with respective species-specific antibodies. The respective immunoglobulin isotypes (isotype control) served as controls. (B) RCAS-PDGFB murine tumor model contained a population of CD133<sup>+</sup> cells, which could be purified by FACS with respective species-specific antibodies. The respective immunoglobulin isotypes (isotype control) served as controls.

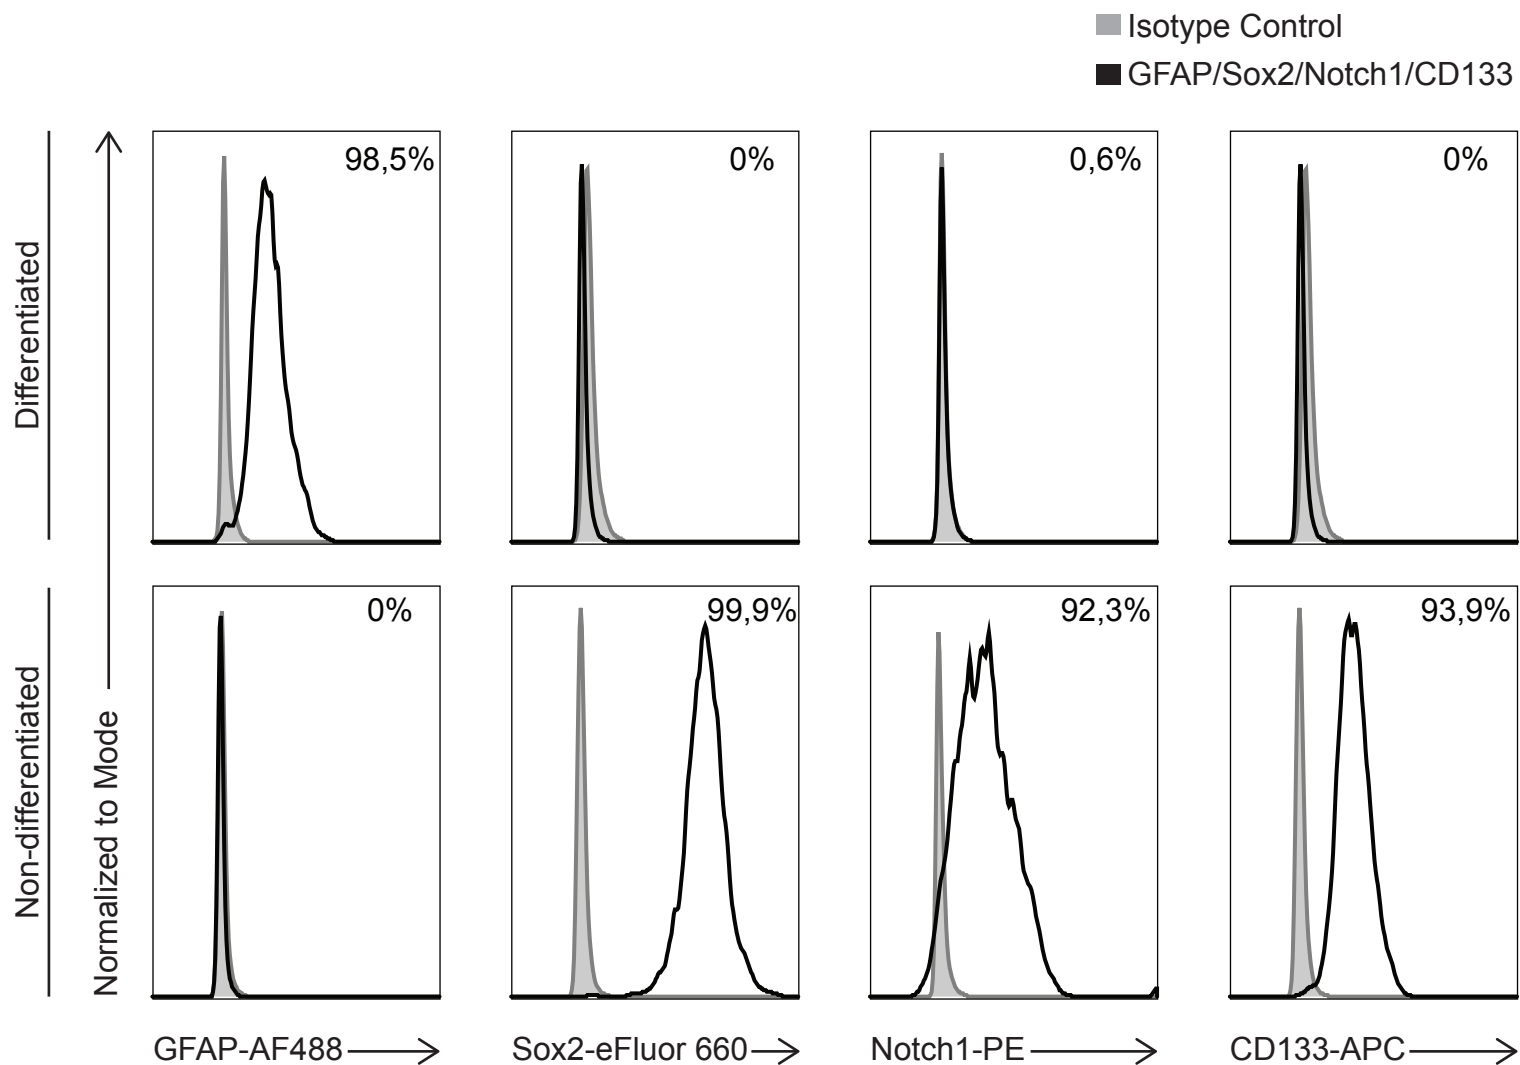

**Supplementary Data Figure 2. Flow cytometric characterization of FACS sorted CD133<sup>+</sup> GL261 cells**  
 Representative histograms of GFAP, Sox2, Notch1 and CD133 expression of FACS sorted CD133<sup>+</sup> GL261 cultured in stem cell medium (non-differentiated) and differentiated with 10% FCS. The gray label indicates isotype control. These data indicate that CD133 positive cells have the capacity to differentiate.

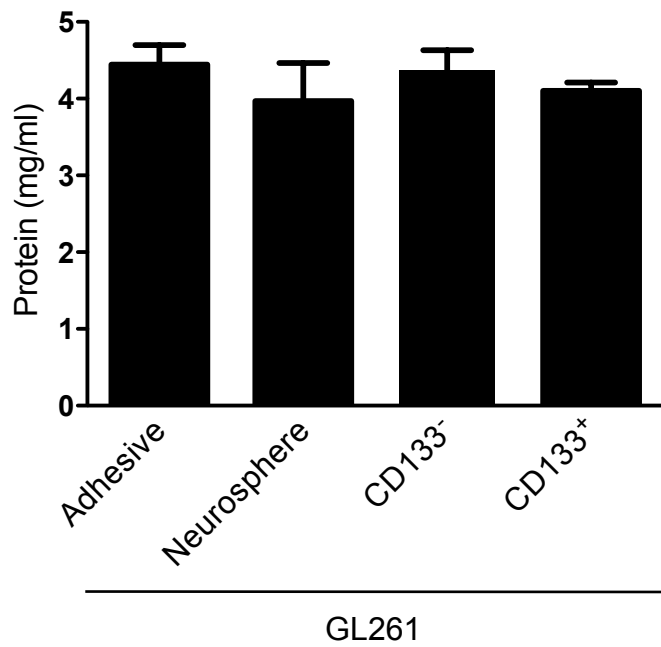

**Supplementary Data Figure 3. Protein concentrations of the conditioned media are equal**  
The protein concentration of the conditioned media were determined using the BCA protein assay reagent from Pierce.

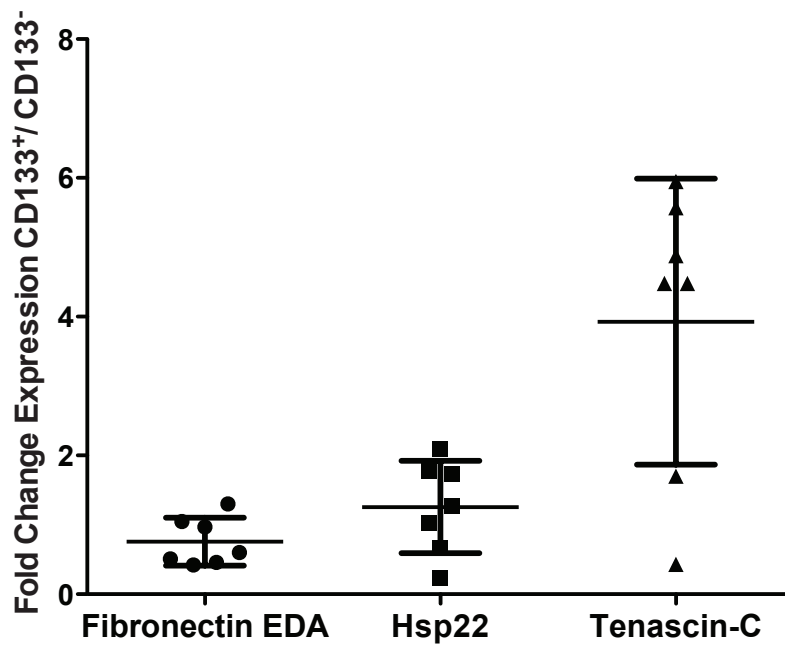

**Supplementary Data Figure 4. Expression levels of selected TLR4-specific ligands in GL261 CD133<sup>+</sup> cells.**

Expression of Fibronectin EDA-domain, Hsp22 and tenascin-C was analyzed by qRT-PCR in FACS sorted CD133<sup>-</sup> and CD133<sup>+</sup> cells from mouse GL261 cell cultures.  $\beta$ -Actin was used as an internal control, target expression in CD133<sup>+</sup> cells was normalized to the respective CD133<sup>-</sup> fraction. Graph represents the fold change from n=7 ( $\pm$ SD) individual CD133<sup>+</sup> cells compared to the CD133<sup>-</sup> fraction isolated from the same sample respectively. HSP22 and EDA are slightly higher expressed in CD133<sup>+</sup> compared to CD133<sup>-</sup> cells, while tenascin-C is significant 4 fold higher expressed in CD133<sup>+</sup> compared to CD133<sup>-</sup> cells.

| <b>Gender</b> | <b>Age</b> | <b>Diagnose</b> | <b>Code in text</b> |
|---------------|------------|-----------------|---------------------|
| Female        | 47         | GBM             | GBM 1               |
| Female        | 62         | GBM             | GBM 2               |
| Male          | 78         | GBM             | GBM 3               |
| Female        | 71         | GBM             | GBM 4               |
| Female        | 54         | GBM             | GBM 5               |
| Male          | 54         | GBM             | GBM 6               |
| Female        | 74         | GBM             | GBM 7               |
| Female        | 31         | GBM             | GBM 8               |

**Supplementary Data Table 1. Overview of resected tumor tissue samples used for qRT-PCR**
